# Supplementary material for: Trafficking of the Menkes copper transporter ATP7A is regulated by clathrin-, AP-2–, AP-1–, and Rab22-dependent steps
Source: PubMed Central journal article supplement — Mol Biol Cell. 2013 Jun 1;24(11):1735–48. doi: 10.1091/mbc.E12-08-0625 (PMC3667726; doi:10.1091/mbc.e12-08-0625), 2013-06-01

**Supplemental Figure 1.** Knockdown of clathrin causes ATP7A mislocalization and inhibits Tf internalization.

(A) clathrin-depleted (CLTC) or control HeLa cells transfected with non-silencing siRNA (-ve) were treated with BCS and incubated at 37 °C with Alexa Fluor 633-Tf prior to fixation (e;f, g;h pink). Cells depleted of clathrin are identified by loss of clathrin heavy chain signal (c;d, g;h red). Cells are counterstained for ATP7A (a;b, g;h green). For quantification of ATP7A and Tf in clathrin-depleted cells see supplemental figure 2.

(B) HeLa cells silenced for clathrin expression were treated with BCS, CuCl<sub>2</sub> or CuCl<sub>2</sub> followed by washout. Cells silenced for clathrin are identified by accumulation of Alexa Fluor 594-Tf at the cell surface (a-c, g-i, red). Cells are counterstained for ATP7A (d-f, g-i, green). In merge panels examples of clathrin-depleted cells are marked \*. Cells with no detectable clathrin knockdown act as internal negative controls and examples are marked with an arrow. Scale bar 10µm.

**Supplemental Figure 2.** Inhibition of ATP7A endocytosis in HeLa cells depleted of clathrin.

HeLa cells, subjected to clathrin heavy chain RNAi (CLTC) or cells transfected with non targeting siRNA (-ve) were allowed to uptake Alexa Fluor 633-Tf (red) prior to processing for IF and detection of ATP7A (green) or clathrin heavy chain (not shown). From the binary image the area occupied by fluorescence was measured in 3000-4000 depleted/control cells and adjusted so the read-out corresponds to area of fluorescence per cell. The chart represents data normalized against the control and therefore clathrin-depleted data is expressed as a fold increase. In control cells ATP7A (or Tf) staining is compact, whereas a significant increase in the area of fluorescence is observed in depleted cells due to the redistribution of ATP7A (or Tf). \* p<0.0001 vs -ve control, \*\* p<0.01 vs -ve control.

**Supplemental Figure 3.** Silencing of CLTC and AP-2 inhibits endocytosis of the CD8/ATP7A C-terminal chimera.

(A) HeLa cells treated with non-targeting siRNA (-ve, a, d, g, j) or siRNA against clathrin heavy chain (CLTC, b, e, h, k) or against AP-2 (c, f, i) are transiently expressing CD8-LL4, a construct in which the CD8 cytoplasmic domain is replaced by the C-terminal 24 amino acids of ATP7A. Internalization of CD8-LL4 was monitored by uptake of the CD8 specific antibody OKT8 (a-c, g-i green). Cells showing knockdown of clathrin or AP-2 were identified by accumulation of Alexa Fluor 633-Tf (d-f, g-i pink) and, for clathrin, by loss of clathrin heavy chain staining (j-k, g-h red). Scale bar 10µm.

(B) The area occupied by OKT8 (or Tf) fluorescence was measured in depleted/control cells from the binary image and adjusted so the read-out corresponds to area of fluorescence per cell. The chart represents data from clathrin or AP-2 depleted conditions, normalized against the control. In control cells OKT8 (or Tf) staining is compact, while in both CLTC and AP-2 depleted cells an increase in the area of fluorescence is observed due to the redistribution of OKT8 (or Tf) caused by the inhibition of internalization. \* p<0.001 vs -ve control, \*\* p<0.01 vs -ve control.

**Supplemental Figure 4.** Rab11 does not regulate ATP7A trafficking.

HeLa cells transiently expressing GFP tagged dominant negative Rab11a<sub>S25N</sub> or Rab11b<sub>S25N</sub> or constitutively active Rab11b<sub>Q70L</sub> were treated with BCS (a-c) or subjected to CuCl<sub>2</sub> treatment (d)

and labeled for endogenous ATP7A (red). No effect on ATP7A localization or trafficking is observed in cells expressing the Rab11 mutants. Importantly, ATP7A does not co-localize with the dispersed recycling endosomes containing Rab11b<sub>Q70L</sub>, even after copper treatment. Scale bar 10µm.

**Supplemental Figure 5.** Expression of dynamin K44A mutants has no effect on ATP7A internalization.

HeLa cells transiently expressing dynamin 1 K44A (panel A) or dynamin 2 K44A (panel B) were treated with BCS, CuCl<sub>2</sub> or CuCl<sub>2</sub> followed by washout. Cells were incubated with Alexa Fluor 594-Tf (g-l, s-x red) at 37°C prior to washing and fixation. Detection of ATP7A (a-f, s-x green), HA-tagged dynamin 1 K444A (m-o, s-u pink) or myc-tagged dynamin 2 K44A (p-r, v-x pink) is shown. Arrows indicate examples of cells expressing the dynamin mutants. Scale bar 10µm.

**Supplemental Figure 6.** Dynasore inhibits ATP7A endocytosis following copper treatment and washout.

HeLa cells were treated with CuCl<sub>2</sub> followed by washout either in the presence of the dynamin inhibiting drug Dynasore or DMSO only (vehicle). ATP7A is detected using a specific antibody (green). In merge panels DAPI stains the nuclei (blue). Scale bar 10µm.

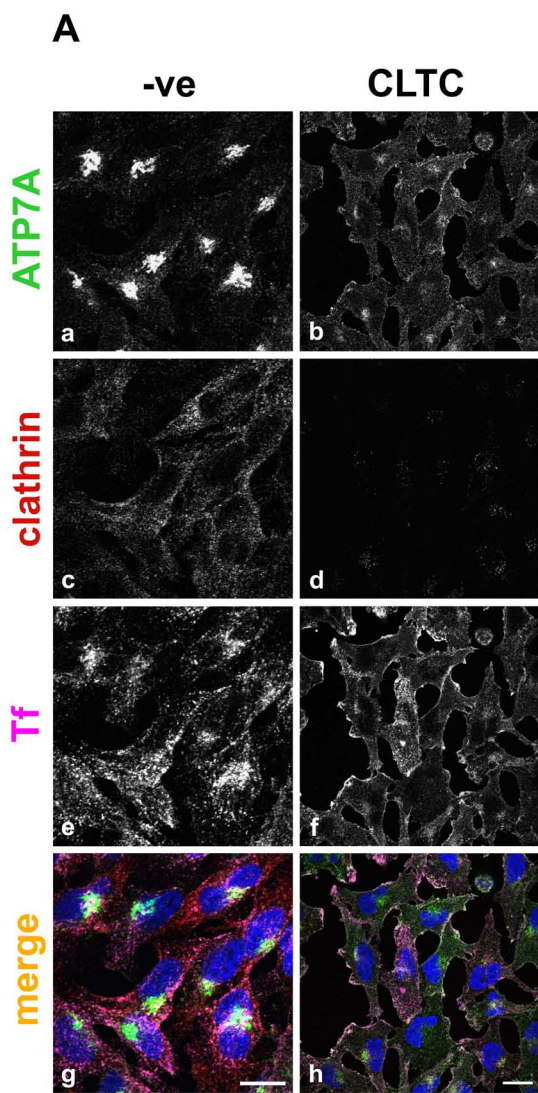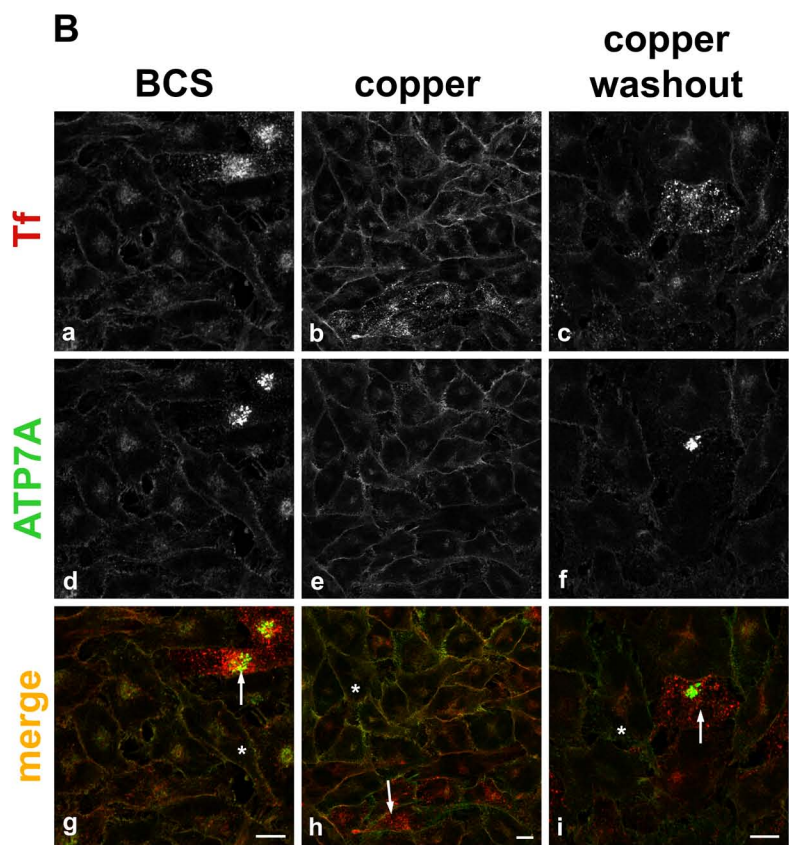

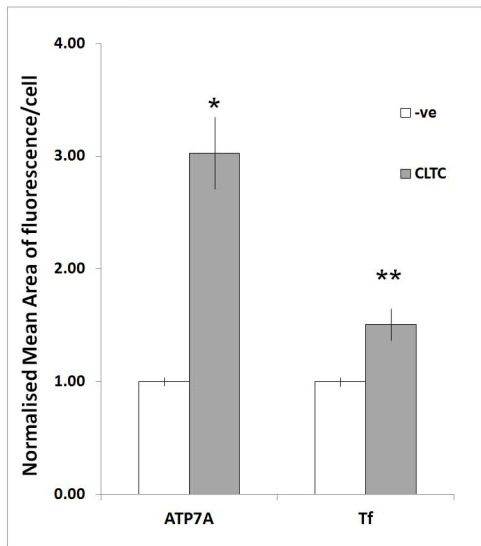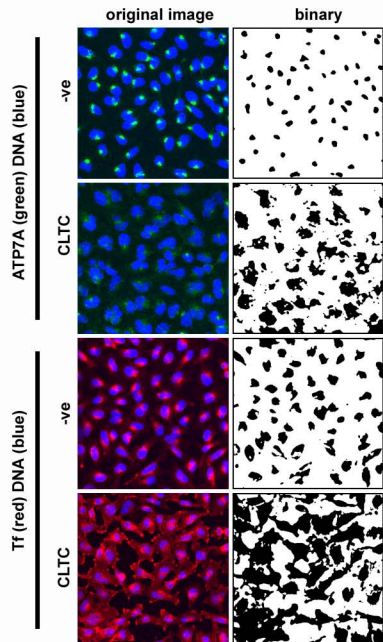

A

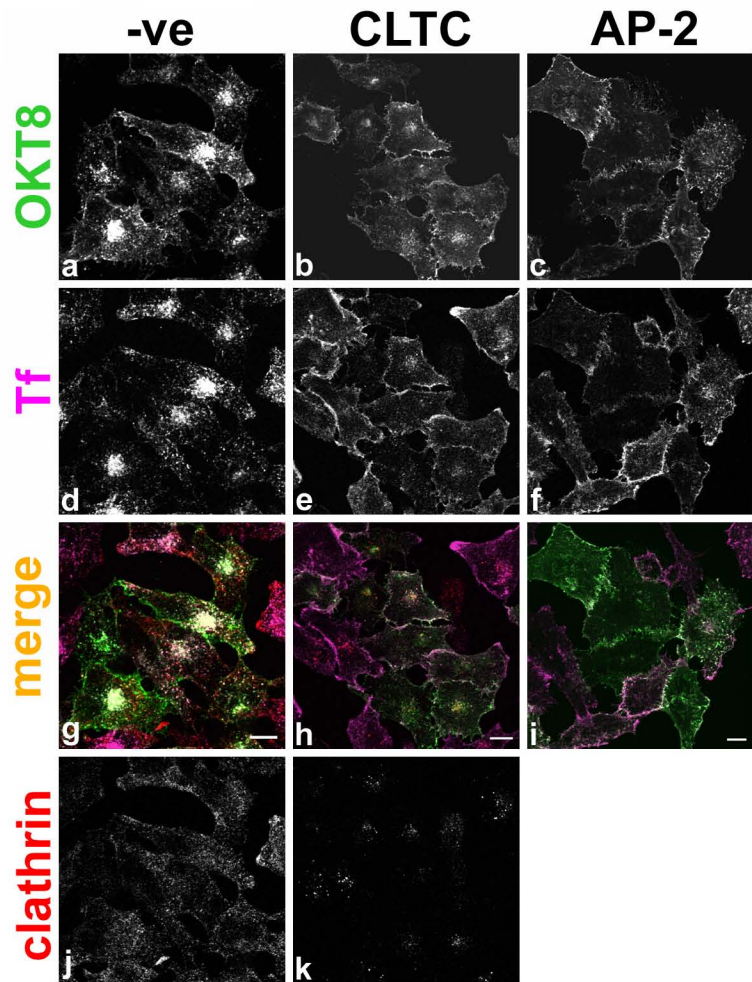

B

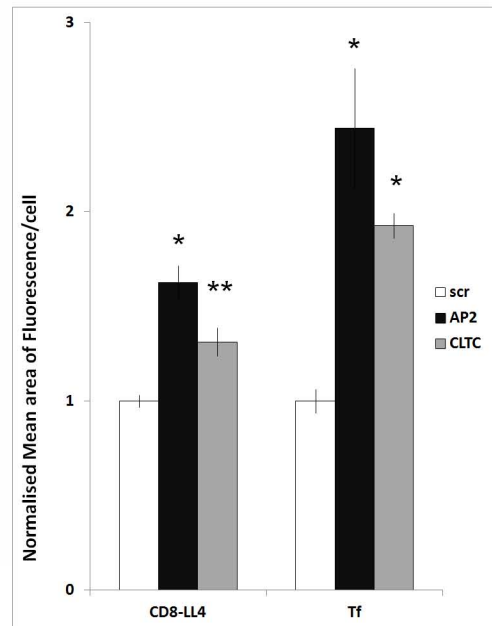

**a****b****c****d****construct**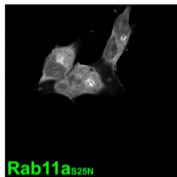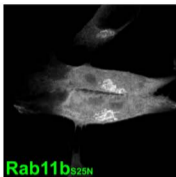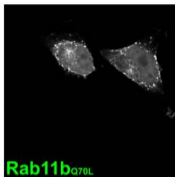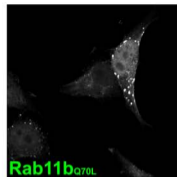**ATP7A**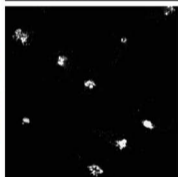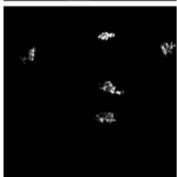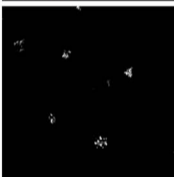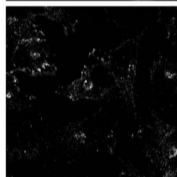**merge**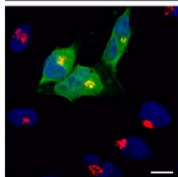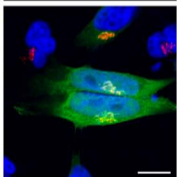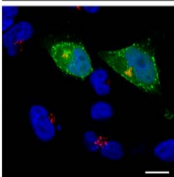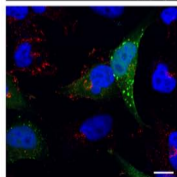



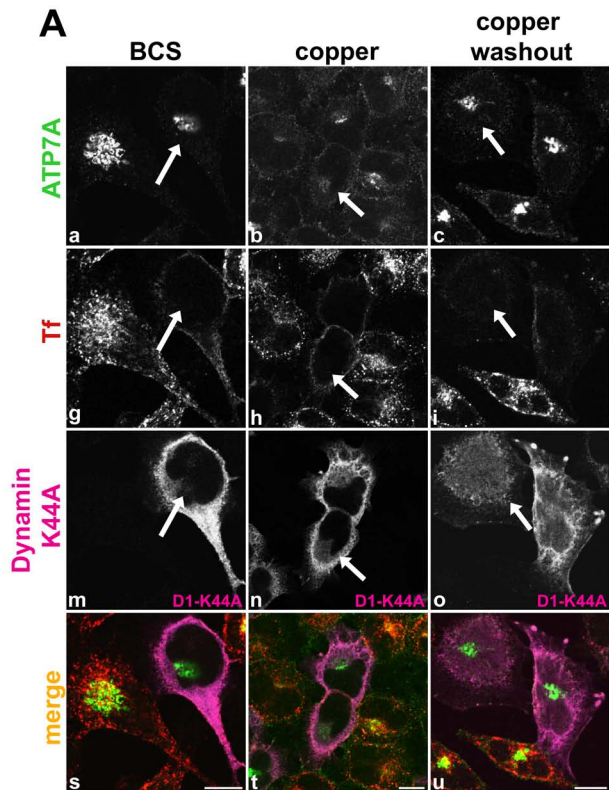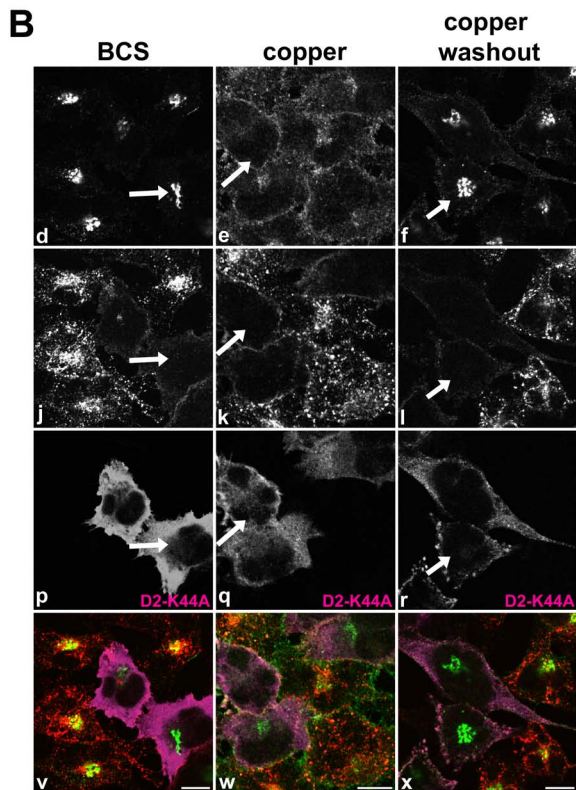

vehicle

Dynasore

ATP7A

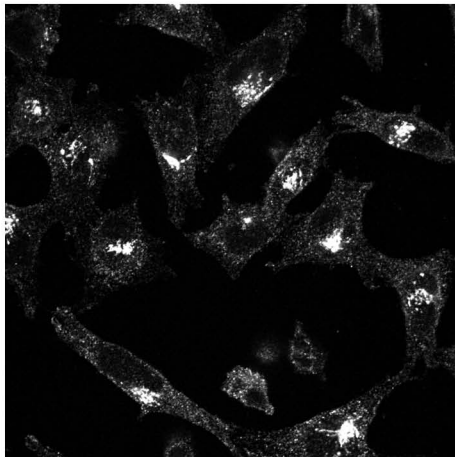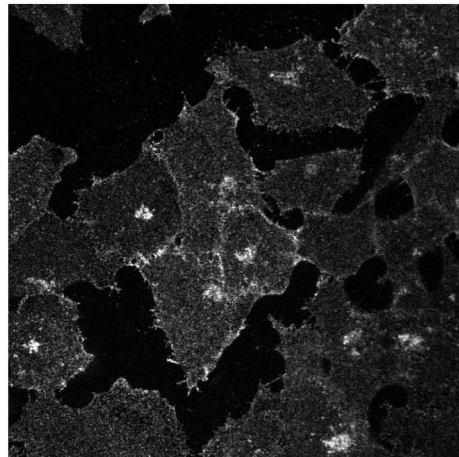

merge

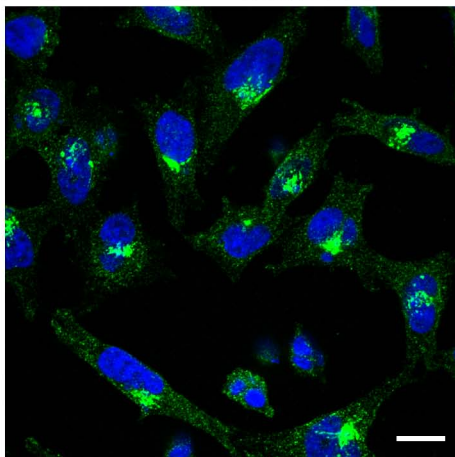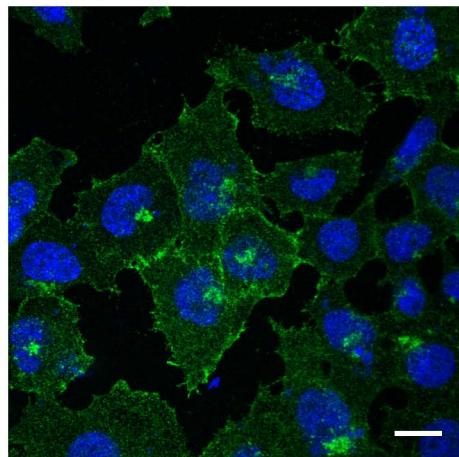

Supplement: supp_E12-08-0625v1_CombinedSupMats.pdf [file supp_E12-08-0625v1_CombinedSupMats.pdf]
